# Supplementary material for: Biocontrol-relevant diversity of wheat-associated Pseudomonas : prevalence of P. sivasensis and identification of the novel species P. arvensis sp. nov.
Source: PeerJ journal article supplement (doi:10.7717/peerj.20177), 2025-11-05

Gent, August 23, 2024

## CERTIFICATE OF DEPOSIT

**This is to certify that the following microorganism has been deposited into the public BCCM/LMG Bacteria Collection and will be available for research purposes without restrictions:**

**LMG Number:** LMG 33711

**Species name:** *Pseudomonas arvensis*

**Depositor:** Mathieu Delitte, UCL - Earth and Life Institute, ELIM, Belgium

**Depositor no:** DR1PS3

The strain has been checked for viability and is preserved using one of the standard methods at BCCM/LMG. Authenticity was confirmed by the BCCM/LMG quality control check as communicated with the depositor.

**BCCM/LMG is not responsible for eventual discrepancies in characterization of the deposited material and its original description.**

Digitally signed by ir  
Claudine Vereecke,  
curator  
Date: 2024.08.23  
09:17:39 +02'00'

GREAT AT SMALL THINGS

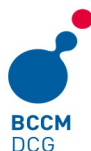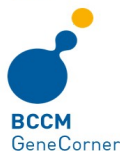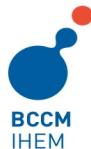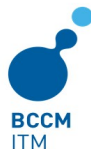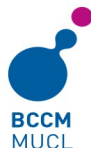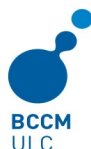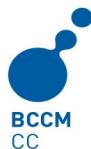

### BCCM/LMG - Laboratory for Microbiology

Ghent University K.L. Ledeganckstraat 35 9000 Gent Belgium

+32 (0)9 264 51 08

[bccm.lmg@ugent.be](mailto:bccm.lmg@ugent.be)

[bccm.belspo.be](http://bccm.belspo.be)

[@BccmCollections](https://twitter.com/BccmCollections)

[BCCM Collections](https://www.linkedin.com/company/bccm-collections)

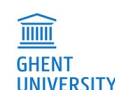

Belgian  
Science  
Policy  
Office

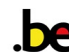

Supplement: 100596CertofDepositStaffHC.pdf [file 100596CertofDepositStaffHC.pdf]
