# Supplementary material for: Biocontrol-relevant diversity of wheat-associated Pseudomonas : prevalence of P. sivasensis and identification of the novel species P. arvensis sp. nov.
Source: PeerJ journal article supplement (doi:10.7717/peerj.20177), 2025-11-05
Supplement: DSM_118704_Confirmation_2024.pdf [file DSM_118704_Confirmation_2024.pdf]

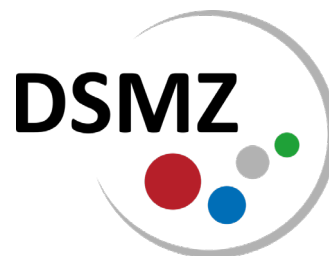

Braunschweig,

**Confirmation of the availability of a strain for the purpose of valid publication of a new  
name according to the Prokaryotic Code**

The following information is confidential and serves only to allow an international journal to confirm that  
a strain has been deposited and will be available from the DSMZ in accordance with the Rules of the  
Prokaryotic Code, ICNP (2022 Revision).

strain

has been deposited in the DSMZ under the number

**DSM**

This strain has been checked for viability and authenticity and is preserved in the DSMZ.

This strain is available in the publicly accessible section of the DSMZ and restrictions have not been placed  
on access to information concerning the presence of this strain in the DSMZ. It will be included in  
published and online catalogues after publication of this number by the authors. Strains collected after  
October 2014, may be accompanied by the Nagoya Protocol documentation (e.g., PIC, MAT, MTA, or  
IRCC), which have been reviewed by DSMZ. All strains will be available from the DSMZ in accordance to  
our standard terms and conditions.

**The DSMZ is not responsible for differences between the properties of the strain deposited in the DSMZ  
and properties given in the literature/databases.**

**It is the sole responsibility of the depositor to ensure that type strains deposited in the DSMZ conform  
to the requirements of the appropriate Rules governing prokaryotes nomenclature and the deposition  
of type strains [Rules 18a, 27, & 30 of the ICNP (2022 Revision)].**
