# Supplementary material for: Biocontrol-relevant diversity of wheat-associated Pseudomonas: prevalence of P. sivasensis and identification of the novel species P. arvensis sp. nov
Source: PeerJ. 2025 Nov 5;13:e20177. doi: 10.7717/peerj.20177 (PMC12595949; doi:10.7717/peerj.20177)
Supplement: Supplemental Information 1 [file peerj-13-20177-s001.xlsx]

## Sheet: Fg
Genus	strain	repetition	pathogen	inhibition measure	remarks	mean
Pseudomonas	AE10PS1	1	F. graminearum	5	No total inhibition, only mycelium growth reduction	3.33333
Pseudomonas	AE10PS1	1	F. graminearum	15	No total inhibition, only mycelium growth reduction
Pseudomonas	AE10PS1	1	F. graminearum	0	No total inhibition, only mycelium growth reduction
Pseudomonas	AE10PS1	2	F. graminearum	0	several drops
Pseudomonas	AE10PS1	2	F. graminearum	0
Pseudomonas	AE10PS1	2	F. graminearum	0
Pseudomonas	AE11PS2	1	F. graminearum	10	No total inhibition, only mycelium growth reduction	6.16667
Pseudomonas	AE11PS2	1	F. graminearum	10	No total inhibition, only mycelium growth reduction
Pseudomonas	AE11PS2	1	F. graminearum	17	No total inhibition, only mycelium growth reduction
Pseudomonas	AE11PS2	2	F. graminearum	0	several drops
Pseudomonas	AE11PS2	2	F. graminearum	0
Pseudomonas	AE11PS2	2	F. graminearum	0
Pseudomonas	AE11PS3	1	F. graminearum	4	No total inhibition, only mycelium growth reduction	5.5
Pseudomonas	AE11PS3	1	F. graminearum	17	No total inhibition, only mycelium growth reduction
Pseudomonas	AE11PS3	1	F. graminearum	12	No total inhibition, only mycelium growth reduction
Pseudomonas	AE11PS3	2	F. graminearum	0	several drops
Pseudomonas	AE11PS3	2	F. graminearum	0
Pseudomonas	AE11PS3	2	F. graminearum	0
Pseudomonas	AE11PS4	1	F. graminearum	10	No total inhibition, only mycelium growth reduction	3
Pseudomonas	AE11PS4	1	F. graminearum	4	No total inhibition, only mycelium growth reduction
Pseudomonas	AE11PS4	1	F. graminearum	4	No total inhibition, only mycelium growth reduction
Pseudomonas	AE11PS4	2	F. graminearum	0
Pseudomonas	AE11PS4	2	F. graminearum	0
Pseudomonas	AE11PS4	2	F. graminearum	0
Pseudomonas	AE12PS1	1	F. graminearum	2	No total inhibition, only mycelium growth reduction	5.33333
Pseudomonas	AE12PS1	1	F. graminearum	15	No total inhibition, only mycelium growth reduction
Pseudomonas	AE12PS1	1	F. graminearum	15	No total inhibition, only mycelium growth reduction
Pseudomonas	AE12PS1	2	F. graminearum	0
Pseudomonas	AE12PS1	2	F. graminearum	0
Pseudomonas	AE12PS1	2	F. graminearum	0
Pseudomonas	AE12PS4	1	F. graminearum	12	No total inhibition, only mycelium growth reduction	3.33333
Pseudomonas	AE12PS4	1	F. graminearum	3	No total inhibition, only mycelium growth reduction
Pseudomonas	AE12PS4	1	F. graminearum	5	No total inhibition, only mycelium growth reduction
Pseudomonas	AE12PS4	2	F. graminearum	0
Pseudomonas	AE12PS4	2	F. graminearum	0
Pseudomonas	AE12PS4	2	F. graminearum	0
Pseudomonas	AE12PS5	1	F. graminearum	0		0
Pseudomonas	AE12PS5	1	F. graminearum	0
Pseudomonas	AE12PS5	1	F. graminearum	0
Pseudomonas	AE12PS5	2	F. graminearum	0
Pseudomonas	AE12PS5	2	F. graminearum	0
Pseudomonas	AE12PS5	2	F. graminearum	0
Pseudomonas	AR11PS3	1	F. graminearum	20	No total inhibition, only mycelium growth reduction	3.33333
Pseudomonas	AR11PS3	1	F. graminearum	0
Pseudomonas	AR11PS3	1	F. graminearum	0
Pseudomonas	AR11PS3	2	F. graminearum	0
Pseudomonas	AR11PS3	2	F. graminearum	0
Pseudomonas	AR11PS3	2	F. graminearum	0
Pseudomonas	AR12PS3	1	F. graminearum	0		5.33333
Pseudomonas	AR12PS3	1	F. graminearum	20	No total inhibition, only mycelium growth reduction
Pseudomonas	AR12PS3	1	F. graminearum	12	No total inhibition, only mycelium growth reduction
Pseudomonas	AR12PS3	2	F. graminearum	0
Pseudomonas	AR12PS3	2	F. graminearum	0
Pseudomonas	AR12PS3	2	F. graminearum	0
Pseudomonas	BE10PS1	1	F. graminearum	0		0
Pseudomonas	BE10PS1	1	F. graminearum	0
Pseudomonas	BE10PS1	1	F. graminearum	0
Pseudomonas	BE10PS1	2	F. graminearum	0
Pseudomonas	BE10PS1	2	F. graminearum	0
Pseudomonas	BE10PS1	2	F. graminearum	0
Pseudomonas	BE10PS1	1	F. graminearum	0		0
Pseudomonas	BE10PS1	1	F. graminearum	0
Pseudomonas	BE10PS1	1	F. graminearum	0
Pseudomonas	BE10PS1	2	F. graminearum	0
Pseudomonas	BE10PS1	2	F. graminearum	0
Pseudomonas	BE10PS1	2	F. graminearum	0
Pseudomonas	BE11PS1	1	F. graminearum	0		0
Pseudomonas	BE11PS1	1	F. graminearum	0
Pseudomonas	BE11PS1	1	F. graminearum	0
Pseudomonas	BE11PS1	2	F. graminearum	0
Pseudomonas	BE11PS1	2	F. graminearum	0
Pseudomonas	BE11PS1	2	F. graminearum	0
Pseudomonas	BF10PS1	1	F. graminearum	0		1.66667
Pseudomonas	BF10PS1	1	F. graminearum	2
Pseudomonas	BF10PS1	1	F. graminearum	0
Pseudomonas	BF10PS1	2	F. graminearum	2
Pseudomonas	BF10PS1	2	F. graminearum	3
Pseudomonas	BF10PS1	2	F. graminearum	3
Pseudomonas	BF6PS1	1	F. graminearum	16	No total inhibition, only mycelium growth reduction	8.66667
Pseudomonas	BF6PS1	1	F. graminearum	16	No total inhibition, only mycelium growth reduction
Pseudomonas	BF6PS1	1	F. graminearum	20	No total inhibition, only mycelium growth reduction
Pseudomonas	BF6PS1	2	F. graminearum	0
Pseudomonas	BF6PS1	2	F. graminearum	0
Pseudomonas	BF6PS1	2	F. graminearum	0
Pseudomonas	BF8PS1	1	F. graminearum	2		5.16667
Pseudomonas	BF8PS1	1	F. graminearum	17	No total inhibition, only mycelium growth reduction
Pseudomonas	BF8PS1	1	F. graminearum	5
Pseudomonas	BF8PS1	2	F. graminearum	3
Pseudomonas	BF8PS1	2	F. graminearum	2
Pseudomonas	BF8PS1	2	F. graminearum	2
Pseudomonas	BR8PS4	1	F. graminearum	2		1.83333
Pseudomonas	BR8PS4	1	F. graminearum	2
Pseudomonas	BR8PS4	1	F. graminearum	1
Pseudomonas	BR8PS4	2	F. graminearum	0
Pseudomonas	BR8PS4	2	F. graminearum	5
Pseudomonas	BR8PS4	2	F. graminearum	1
Pseudomonas	BR8PS5	1	F. graminearum	0		0.166667
Pseudomonas	BR8PS5	1	F. graminearum	0
Pseudomonas	BR8PS5	1	F. graminearum	0
Pseudomonas	BR8PS5	2	F. graminearum	0
Pseudomonas	BR8PS5	2	F. graminearum	0
Pseudomonas	BR8PS5	2	F. graminearum	1
Pseudomonas	BS3PS2	1	F. graminearum	2		1.16667
Pseudomonas	BS3PS2	1	F. graminearum	2
Pseudomonas	BS3PS2	1	F. graminearum	3
Pseudomonas	BS3PS2	2	F. graminearum	0
Pseudomonas	BS3PS2	2	F. graminearum	0
Pseudomonas	BS3PS2	2	F. graminearum	0
Pseudomonas	BS3PS3	1	F. graminearum	3		1
Pseudomonas	BS3PS3	1	F. graminearum	0
Pseudomonas	BS3PS3	1	F. graminearum	3
Pseudomonas	BS3PS3	2	F. graminearum	0
Pseudomonas	BS3PS3	2	F. graminearum	0
Pseudomonas	BS3PS3	2	F. graminearum	0
Pseudomonas	CE10PS1	1	F. graminearum	0		0
Pseudomonas	CE10PS1	1	F. graminearum	0
Pseudomonas	CE10PS1	1	F. graminearum	0
Pseudomonas	CE10PS1	2	F. graminearum	0
Pseudomonas	CE10PS1	2	F. graminearum	0
Pseudomonas	CE10PS1	2	F. graminearum	0
Pseudomonas	CF10PS3	1	F. graminearum	0		0
Pseudomonas	CF10PS3	1	F. graminearum	0
Pseudomonas	CF10PS3	1	F. graminearum	0
Pseudomonas	CF10PS3	2	F. graminearum	0
Pseudomonas	CF10PS3	2	F. graminearum	0
Pseudomonas	CF10PS3	2	F. graminearum	0
Pseudomonas	CF10PS4	1	F. graminearum	10	No total inhibition, only mycelium growth reduction	1.66667
Pseudomonas	CF10PS4	1	F. graminearum	0
Pseudomonas	CF10PS4	1	F. graminearum	0
Pseudomonas	CF10PS4	2	F. graminearum	0
Pseudomonas	CF10PS4	2	F. graminearum	0
Pseudomonas	CF10PS4	2	F. graminearum	0
Pseudomonas	CF11PS1	1	F. graminearum	0		2.33333
Pseudomonas	CF11PS1	1	F. graminearum	7	No total inhibition, only mycelium growth reduction
Pseudomonas	CF11PS1	1	F. graminearum	7	No total inhibition, only mycelium growth reduction
Pseudomonas	CF11PS1	2	F. graminearum	0
Pseudomonas	CF11PS1	2	F. graminearum	0
Pseudomonas	CF11PS1	2	F. graminearum	0
Pseudomonas	CR3PS2	1	F. graminearum	20	No total inhibition, only mycelium growth reduction	3.33333
Pseudomonas	CR3PS2	1	F. graminearum	0
Pseudomonas	CR3PS2	1	F. graminearum	0
Pseudomonas	CR3PS2	2	F. graminearum	0
Pseudomonas	CR3PS2	2	F. graminearum	0
Pseudomonas	CR3PS2	2	F. graminearum	0
Pseudomonas	CR6PS3	1	F. graminearum	5		2.83333
Pseudomonas	CR6PS3	1	F. graminearum	3
Pseudomonas	CR6PS3	1	F. graminearum	3
Pseudomonas	CR6PS3	2	F. graminearum	5
Pseudomonas	CR6PS3	2	F. graminearum	1
Pseudomonas	CR6PS3	2	F. graminearum	0
Pseudomonas	CR6PS4	1	F. graminearum	5		2.5
Pseudomonas	CR6PS4	1	F. graminearum	2
Pseudomonas	CR6PS4	1	F. graminearum	0
Pseudomonas	CR6PS4	2	F. graminearum	7
Pseudomonas	CR6PS4	2	F. graminearum	0
Pseudomonas	CR6PS4	2	F. graminearum	1
Pseudomonas	CR6PS5	1	F. graminearum	3		2
Pseudomonas	CR6PS5	1	F. graminearum	3
Pseudomonas	CR6PS5	1	F. graminearum	2
Pseudomonas	CR6PS5	2	F. graminearum	3
Pseudomonas	CR6PS5	2	F. graminearum	0
Pseudomonas	CR6PS5	2	F. graminearum	1
Pseudomonas	CR7PS1	1	F. graminearum	24	No total inhibition, only mycelium growth reduction	4
Pseudomonas	CR7PS1	1	F. graminearum	0
Pseudomonas	CR7PS1	1	F. graminearum	0
Pseudomonas	CR7PS1	2	F. graminearum	0
Pseudomonas	CR7PS1	2	F. graminearum	0
Pseudomonas	CR7PS1	2	F. graminearum	0
Pseudomonas	DR10PS5	1	F. graminearum	23	No total inhibition, only mycelium growth reduction	7.16667
Pseudomonas	DR10PS5	1	F. graminearum	15	No total inhibition, only mycelium growth reduction
Pseudomonas	DR10PS5	1	F. graminearum	5
Pseudomonas	DR10PS5	2	F. graminearum	0
Pseudomonas	DR10PS5	2	F. graminearum	0
Pseudomonas	DR10PS5	2	F. graminearum	0
Pseudomonas	DR1PS3	1	F. graminearum	0		13.3333
Pseudomonas	DR1PS3	1	F. graminearum	20	No total inhibition, only mycelium growth reduction
Pseudomonas	DR1PS3	1	F. graminearum	20	No total inhibition, only mycelium growth reduction
Pseudomonas	DR1PS3	2	F. graminearum	/	Fungus over bacteria
Pseudomonas	DR1PS3	2	F. graminearum	/	Fungus over bacteria
Pseudomonas	DR1PS3	2	F. graminearum	/	Fungus over bacteria
Pseudomonas	DR4PS3	1	F. graminearum	0		6.66667
Pseudomonas	DR4PS3	1	F. graminearum	20	No total inhibition, only mycelium growth reduction
Pseudomonas	DR4PS3	1	F. graminearum	20	No total inhibition, only mycelium growth reduction
Pseudomonas	DR4PS3	2	F. graminearum	0
Pseudomonas	DR4PS3	2	F. graminearum	0
Pseudomonas	DR4PS3	2	F. graminearum	0
Pseudomonas	DS3PS4	1	F. graminearum	13	No total inhibition, only mycelium growth reduction	8.5
Pseudomonas	DS3PS4	1	F. graminearum	20	No total inhibition, only mycelium growth reduction
Pseudomonas	DS3PS4	1	F. graminearum	18	No total inhibition, only mycelium growth reduction
Pseudomonas	DS3PS4	2	F. graminearum	0
Pseudomonas	DS3PS4	2	F. graminearum	0
Pseudomonas	DS3PS4	2	F. graminearum	0
Pseudomonas	DS3PS5	1	F. graminearum	16	No total inhibition, only mycelium growth reduction	7.66667
Pseudomonas	DS3PS5	1	F. graminearum	13	No total inhibition, only mycelium growth reduction
Pseudomonas	DS3PS5	1	F. graminearum	17	No total inhibition, only mycelium growth reduction
Pseudomonas	DS3PS5	2	F. graminearum	0
Pseudomonas	DS3PS5	2	F. graminearum	0
Pseudomonas	DS3PS5	2	F. graminearum	0

## Sheet: Ggt
Genus	strain	repetition	pathogen	inhibition measure	remarks	mean
Pseudomonas	AE10PS1	1	G.graminis tritici	5		7.16667
Pseudomonas	AE10PS1	1	G.graminis tritici	10
Pseudomonas	AE10PS1	1	G.graminis tritici	4
Pseudomonas	AE10PS1	2	G.graminis tritici	13
Pseudomonas	AE10PS1	2	G.graminis tritici	6
Pseudomonas	AE10PS1	2	G.graminis tritici	5
Pseudomonas	AE11PS2	1	G.graminis tritici	5		5.16667
Pseudomonas	AE11PS2	1	G.graminis tritici	5
Pseudomonas	AE11PS2	1	G.graminis tritici	3
Pseudomonas	AE11PS2	2	G.graminis tritici	11
Pseudomonas	AE11PS2	2	G.graminis tritici	2
Pseudomonas	AE11PS2	2	G.graminis tritici	5
Pseudomonas	AE11PS3	1	G.graminis tritici	10		6.83333
Pseudomonas	AE11PS3	1	G.graminis tritici	3
Pseudomonas	AE11PS3	1	G.graminis tritici	5
Pseudomonas	AE11PS3	2	G.graminis tritici	12
Pseudomonas	AE11PS3	2	G.graminis tritici	4
Pseudomonas	AE11PS3	2	G.graminis tritici	7
Pseudomonas	AE11PS4	1	G.graminis tritici	3		3
Pseudomonas	AE11PS4	1	G.graminis tritici	4
Pseudomonas	AE11PS4	1	G.graminis tritici	/	several drops
Pseudomonas	AE11PS4	2	G.graminis tritici	3
Pseudomonas	AE11PS4	2	G.graminis tritici	3
Pseudomonas	AE11PS4	2	G.graminis tritici	2
Pseudomonas	AE12PS1	1	G.graminis tritici	5		3.83333
Pseudomonas	AE12PS1	1	G.graminis tritici	6
Pseudomonas	AE12PS1	1	G.graminis tritici	6
Pseudomonas	AE12PS1	2	G.graminis tritici	2
Pseudomonas	AE12PS1	2	G.graminis tritici	3
Pseudomonas	AE12PS1	2	G.graminis tritici	1
Pseudomonas	AE12PS4	1	G.graminis tritici	3		2.83333
Pseudomonas	AE12PS4	1	G.graminis tritici	4
Pseudomonas	AE12PS4	1	G.graminis tritici	0
Pseudomonas	AE12PS4	2	G.graminis tritici	3
Pseudomonas	AE12PS4	2	G.graminis tritici	4
Pseudomonas	AE12PS4	2	G.graminis tritici	3
Pseudomonas	AE12PS5	1	G.graminis tritici	7		3.33333
Pseudomonas	AE12PS5	1	G.graminis tritici	1
Pseudomonas	AE12PS5	1	G.graminis tritici	1
Pseudomonas	AE12PS5	2	G.graminis tritici	4
Pseudomonas	AE12PS5	2	G.graminis tritici	3
Pseudomonas	AE12PS5	2	G.graminis tritici	4
Pseudomonas	AR11PS3	1	G.graminis tritici	17		15.8333
Pseudomonas	AR11PS3	1	G.graminis tritici	18
Pseudomonas	AR11PS3	1	G.graminis tritici	11
Pseudomonas	AR11PS3	2	G.graminis tritici	15
Pseudomonas	AR11PS3	2	G.graminis tritici	18
Pseudomonas	AR11PS3	2	G.graminis tritici	16
Pseudomonas	AR12PS3	1	G.graminis tritici	15		17.8333
Pseudomonas	AR12PS3	1	G.graminis tritici	15
Pseudomonas	AR12PS3	1	G.graminis tritici	13
Pseudomonas	AR12PS3	2	G.graminis tritici	24
Pseudomonas	AR12PS3	2	G.graminis tritici	20
Pseudomonas	AR12PS3	2	G.graminis tritici	20
Pseudomonas	BE10PS1	1	G.graminis tritici	3		3.33333
Pseudomonas	BE10PS1	1	G.graminis tritici	4
Pseudomonas	BE10PS1	1	G.graminis tritici	5
Pseudomonas	BE10PS1	2	G.graminis tritici	3
Pseudomonas	BE10PS1	2	G.graminis tritici	4
Pseudomonas	BE10PS1	2	G.graminis tritici	1	several drops
Pseudomonas	BE10PS1	1	G.graminis tritici	3		3
Pseudomonas	BE10PS1	1	G.graminis tritici	4
Pseudomonas	BE10PS1	1	G.graminis tritici	2
Pseudomonas	BE10PS1	2	G.graminis tritici	3
Pseudomonas	BE10PS1	2	G.graminis tritici	3
Pseudomonas	BE10PS1	2	G.graminis tritici	3
Pseudomonas	BE11PS1	1	G.graminis tritici	5		4.66667
Pseudomonas	BE11PS1	1	G.graminis tritici	5
Pseudomonas	BE11PS1	1	G.graminis tritici	5
Pseudomonas	BE11PS1	2	G.graminis tritici	4
Pseudomonas	BE11PS1	2	G.graminis tritici	6
Pseudomonas	BE11PS1	2	G.graminis tritici	3
Pseudomonas	BF10PS1	1	G.graminis tritici	19		14
Pseudomonas	BF10PS1	1	G.graminis tritici	/	several drops
Pseudomonas	BF10PS1	1	G.graminis tritici	14
Pseudomonas	BF10PS1	2	G.graminis tritici	12
Pseudomonas	BF10PS1	2	G.graminis tritici	14
Pseudomonas	BF10PS1	2	G.graminis tritici	11
Pseudomonas	BF6PS1	1	G.graminis tritici	13		14.1667
Pseudomonas	BF6PS1	1	G.graminis tritici	13
Pseudomonas	BF6PS1	1	G.graminis tritici	8
Pseudomonas	BF6PS1	2	G.graminis tritici	18
Pseudomonas	BF6PS1	2	G.graminis tritici	18
Pseudomonas	BF6PS1	2	G.graminis tritici	15
Pseudomonas	BF8PS1	1	G.graminis tritici	10		10.6667
Pseudomonas	BF8PS1	1	G.graminis tritici	10
Pseudomonas	BF8PS1	1	G.graminis tritici	9
Pseudomonas	BF8PS1	2	G.graminis tritici	10
Pseudomonas	BF8PS1	2	G.graminis tritici	14
Pseudomonas	BF8PS1	2	G.graminis tritici	11
Pseudomonas	BR8PS4	1	G.graminis tritici	16		13
Pseudomonas	BR8PS4	1	G.graminis tritici	/	several drops
Pseudomonas	BR8PS4	1	G.graminis tritici	8
Pseudomonas	BR8PS4	2	G.graminis tritici	14
Pseudomonas	BR8PS4	2	G.graminis tritici	15
Pseudomonas	BR8PS4	2	G.graminis tritici	12
Pseudomonas	BR8PS5	1	G.graminis tritici	10		10
Pseudomonas	BR8PS5	1	G.graminis tritici	/	several drops
Pseudomonas	BR8PS5	1	G.graminis tritici	8
Pseudomonas	BR8PS5	2	G.graminis tritici	11
Pseudomonas	BR8PS5	2	G.graminis tritici	11
Pseudomonas	BR8PS5	2	G.graminis tritici	10
Pseudomonas	BS3PS2	1	G.graminis tritici	13		12.6667
Pseudomonas	BS3PS2	1	G.graminis tritici	11
Pseudomonas	BS3PS2	1	G.graminis tritici	14
Pseudomonas	BS3PS2	2	G.graminis tritici	15
Pseudomonas	BS3PS2	2	G.graminis tritici	13
Pseudomonas	BS3PS2	2	G.graminis tritici	10
Pseudomonas	BS3PS3	1	G.graminis tritici	13		12.6667
Pseudomonas	BS3PS3	1	G.graminis tritici	11
Pseudomonas	BS3PS3	1	G.graminis tritici	12
Pseudomonas	BS3PS3	2	G.graminis tritici	15
Pseudomonas	BS3PS3	2	G.graminis tritici	12
Pseudomonas	BS3PS3	2	G.graminis tritici	13
Pseudomonas	CE10PS1	1	G.graminis tritici	2		3.66667
Pseudomonas	CE10PS1	1	G.graminis tritici	3
Pseudomonas	CE10PS1	1	G.graminis tritici	3
Pseudomonas	CE10PS1	2	G.graminis tritici	7
Pseudomonas	CE10PS1	2	G.graminis tritici	4
Pseudomonas	CE10PS1	2	G.graminis tritici	3
Pseudomonas	CF10PS3	3	G.graminis tritici	8		5.66667
Pseudomonas	CF10PS3	1	G.graminis tritici	3
Pseudomonas	CF10PS3	1	G.graminis tritici	8
Pseudomonas	CF10PS3	2	G.graminis tritici	4
Pseudomonas	CF10PS3	2	G.graminis tritici	6
Pseudomonas	CF10PS3	2	G.graminis tritici	5
Pseudomonas	CF10PS4	1	G.graminis tritici	14	drops near plug	12
Pseudomonas	CF10PS4	1	G.graminis tritici	13
Pseudomonas	CF10PS4	1	G.graminis tritici	12
Pseudomonas	CF10PS4	2	G.graminis tritici	12
Pseudomonas	CF10PS4	2	G.graminis tritici	12
Pseudomonas	CF10PS4	2	G.graminis tritici	9
Pseudomonas	CF11PS1	1	G.graminis tritici	5		6
Pseudomonas	CF11PS1	1	G.graminis tritici	3
Pseudomonas	CF11PS1	1	G.graminis tritici	13	drops near plug
Pseudomonas	CF11PS1	2	G.graminis tritici	5
Pseudomonas	CF11PS1	2	G.graminis tritici	6
Pseudomonas	CF11PS1	2	G.graminis tritici	4
Pseudomonas	CR3PS2	1	G.graminis tritici	8		13.8333
Pseudomonas	CR3PS2	1	G.graminis tritici	12
Pseudomonas	CR3PS2	1	G.graminis tritici	14
Pseudomonas	CR3PS2	2	G.graminis tritici	17
Pseudomonas	CR3PS2	2	G.graminis tritici	17
Pseudomonas	CR3PS2	2	G.graminis tritici	15
Pseudomonas	CR6PS3	1	G.graminis tritici	10		11
Pseudomonas	CR6PS3	1	G.graminis tritici	11
Pseudomonas	CR6PS3	1	G.graminis tritici	10
Pseudomonas	CR6PS3	2	G.graminis tritici	12
Pseudomonas	CR6PS3	2	G.graminis tritici	11
Pseudomonas	CR6PS3	2	G.graminis tritici	12
Pseudomonas	CR6PS4	1	G.graminis tritici	10		9.5
Pseudomonas	CR6PS4	1	G.graminis tritici	12
Pseudomonas	CR6PS4	1	G.graminis tritici	9
Pseudomonas	CR6PS4	2	G.graminis tritici	6
Pseudomonas	CR6PS4	2	G.graminis tritici	10
Pseudomonas	CR6PS4	2	G.graminis tritici	10
Pseudomonas	CR6PS5	1	G.graminis tritici	9		10.5
Pseudomonas	CR6PS5	1	G.graminis tritici	8
Pseudomonas	CR6PS5	1	G.graminis tritici	9
Pseudomonas	CR6PS5	2	G.graminis tritici	13
Pseudomonas	CR6PS5	2	G.graminis tritici	12
Pseudomonas	CR6PS5	2	G.graminis tritici	12
Pseudomonas	CR7PS1	1	G.graminis tritici	3		7
Pseudomonas	CR7PS1	1	G.graminis tritici	5
Pseudomonas	CR7PS1	1	G.graminis tritici	10
Pseudomonas	CR7PS1	2	G.graminis tritici	11
Pseudomonas	CR7PS1	2	G.graminis tritici	5
Pseudomonas	CR7PS1	2	G.graminis tritici	8
Pseudomonas	DR10PS5	1	G.graminis tritici	4		6.5
Pseudomonas	DR10PS5	1	G.graminis tritici	3
Pseudomonas	DR10PS5	1	G.graminis tritici	9
Pseudomonas	DR10PS5	2	G.graminis tritici	11
Pseudomonas	DR10PS5	2	G.graminis tritici	7
Pseudomonas	DR10PS5	2	G.graminis tritici	5
Pseudomonas	DR1PS3	1	G.graminis tritici	10		9.4
Pseudomonas	DR1PS3	1	G.graminis tritici	7
Pseudomonas	DR1PS3	1	G.graminis tritici	10
Pseudomonas	DR1PS3	2	G.graminis tritici	/	Contamination
Pseudomonas	DR1PS3	2	G.graminis tritici	13
Pseudomonas	DR1PS3	2	G.graminis tritici	7
Pseudomonas	DR4PS3	1	G.graminis tritici	10		9
Pseudomonas	DR4PS3	1	G.graminis tritici	10
Pseudomonas	DR4PS3	1	G.graminis tritici	10
Pseudomonas	DR4PS3	2	G.graminis tritici	9
Pseudomonas	DR4PS3	2	G.graminis tritici	7
Pseudomonas	DR4PS3	2	G.graminis tritici	8
Pseudomonas	DS3PS4	1	G.graminis tritici	10		8.5
Pseudomonas	DS3PS4	1	G.graminis tritici	10
Pseudomonas	DS3PS4	1	G.graminis tritici	5
Pseudomonas	DS3PS4	2	G.graminis tritici	8
Pseudomonas	DS3PS4	2	G.graminis tritici	11
Pseudomonas	DS3PS4	2	G.graminis tritici	7
Pseudomonas	DS3PS5	1	G.graminis tritici	8		8
Pseudomonas	DS3PS5	1	G.graminis tritici	/	several drops
Pseudomonas	DS3PS5	1	G.graminis tritici	8
Pseudomonas	DS3PS5	2	G.graminis tritici	8
Pseudomonas	DS3PS5	2	G.graminis tritici	8
Pseudomonas	DS3PS5	2	G.graminis tritici	8

## Sheet: Oy
Genus	strain	repetition	pathogen	inhibition measure	remarks	mean
Pseudomonas	AE10PS1	1	O. yallundae	18		17.6667
Pseudomonas	AE10PS1	1	O. yallundae	24
Pseudomonas	AE10PS1	1	O. yallundae	16
Pseudomonas	AE10PS1	2	O. yallundae	13
Pseudomonas	AE10PS1	2	O. yallundae	19
Pseudomonas	AE10PS1	2	O. yallundae	16
Pseudomonas	AE11PS2	1	O. yallundae	15		13.3333
Pseudomonas	AE11PS2	1	O. yallundae	16
Pseudomonas	AE11PS2	1	O. yallundae	15
Pseudomonas	AE11PS2	2	O. yallundae	10
Pseudomonas	AE11PS2	2	O. yallundae	14
Pseudomonas	AE11PS2	2	O. yallundae	10
Pseudomonas	AE11PS3	1	O. yallundae	20		16.3333
Pseudomonas	AE11PS3	1	O. yallundae	15
Pseudomonas	AE11PS3	1	O. yallundae	14
Pseudomonas	AE11PS3	2	O. yallundae	17
Pseudomonas	AE11PS3	2	O. yallundae	15
Pseudomonas	AE11PS3	2	O. yallundae	17
Pseudomonas	AE11PS4	1	O. yallundae	13		15.8333
Pseudomonas	AE11PS4	1	O. yallundae	16
Pseudomonas	AE11PS4	1	O. yallundae	18
Pseudomonas	AE11PS4	2	O. yallundae	15	Contamination
Pseudomonas	AE11PS4	2	O. yallundae	18
Pseudomonas	AE11PS4	2	O. yallundae	15
Pseudomonas	AE12PS1	1	O. yallundae	10		13.4
Pseudomonas	AE12PS1	1	O. yallundae	11
Pseudomonas	AE12PS1	1	O. yallundae	14
Pseudomonas	AE12PS1	2	O. yallundae	/
Pseudomonas	AE12PS1	2	O. yallundae	17
Pseudomonas	AE12PS1	2	O. yallundae	15
Pseudomonas	AE12PS4	1	O. yallundae	16	Too much bacterial growth	15
Pseudomonas	AE12PS4	1	O. yallundae	15	Too much bacterial growth
Pseudomonas	AE12PS4	1	O. yallundae	14	Too much bacterial growth
Pseudomonas	AE12PS4	2	O. yallundae	15
Pseudomonas	AE12PS4	2	O. yallundae	16
Pseudomonas	AE12PS4	2	O. yallundae	14
Pseudomonas	AE12PS5	1	O. yallundae	13		14.8333
Pseudomonas	AE12PS5	1	O. yallundae	17
Pseudomonas	AE12PS5	1	O. yallundae	12
Pseudomonas	AE12PS5	2	O. yallundae	18
Pseudomonas	AE12PS5	2	O. yallundae	14
Pseudomonas	AE12PS5	2	O. yallundae	15
Pseudomonas	AR11PS3	1	O. yallundae	23		18.6667
Pseudomonas	AR11PS3	1	O. yallundae	15	Several drops
Pseudomonas	AR11PS3	1	O. yallundae	16
Pseudomonas	AR11PS3	2	O. yallundae	21
Pseudomonas	AR11PS3	2	O. yallundae	19
Pseudomonas	AR11PS3	2	O. yallundae	18
Pseudomonas	AR12PS3	1	O. yallundae	22		23.6667
Pseudomonas	AR12PS3	1	O. yallundae	27
Pseudomonas	AR12PS3	1	O. yallundae	24
Pseudomonas	AR12PS3	2	O. yallundae	23
Pseudomonas	AR12PS3	2	O. yallundae	25
Pseudomonas	AR12PS3	2	O. yallundae	21
Pseudomonas	BE10PS1	1	O. yallundae	10		12.3333
Pseudomonas	BE10PS1	1	O. yallundae	15
Pseudomonas	BE10PS1	1	O. yallundae	12
Pseudomonas	BE10PS1	2	O. yallundae	9
Pseudomonas	BE10PS1	2	O. yallundae	14
Pseudomonas	BE10PS1	2	O. yallundae	14
Pseudomonas	BE10PS1	1	O. yallundae	21		14.3333
Pseudomonas	BE10PS1	1	O. yallundae	11
Pseudomonas	BE10PS1	1	O. yallundae	13
Pseudomonas	BE10PS1	2	O. yallundae	11
Pseudomonas	BE10PS1	2	O. yallundae	13
Pseudomonas	BE10PS1	2	O. yallundae	17
Pseudomonas	BE11PS1	1	O. yallundae	14		13.6667
Pseudomonas	BE11PS1	1	O. yallundae	12
Pseudomonas	BE11PS1	1	O. yallundae	10
Pseudomonas	BE11PS1	2	O. yallundae	18
Pseudomonas	BE11PS1	2	O. yallundae	12
Pseudomonas	BE11PS1	2	O. yallundae	16
Pseudomonas	BF10PS1	1	O. yallundae	15		15.6667
Pseudomonas	BF10PS1	1	O. yallundae	12
Pseudomonas	BF10PS1	1	O. yallundae	15
Pseudomonas	BF10PS1	2	O. yallundae	22
Pseudomonas	BF10PS1	2	O. yallundae	15
Pseudomonas	BF10PS1	2	O. yallundae	15
Pseudomonas	BF6PS1	1	O. yallundae	7		14
Pseudomonas	BF6PS1	1	O. yallundae	14
Pseudomonas	BF6PS1	1	O. yallundae	15
Pseudomonas	BF6PS1	2	O. yallundae	17
Pseudomonas	BF6PS1	2	O. yallundae	17
Pseudomonas	BF6PS1	2	O. yallundae	14
Pseudomonas	BF8PS1	1	O. yallundae	16		15.3333
Pseudomonas	BF8PS1	1	O. yallundae	14
Pseudomonas	BF8PS1	1	O. yallundae	20
Pseudomonas	BF8PS1	2	O. yallundae	11
Pseudomonas	BF8PS1	2	O. yallundae	15
Pseudomonas	BF8PS1	2	O. yallundae	16
Pseudomonas	BR8PS4	1	O. yallundae	17		16.3333
Pseudomonas	BR8PS4	1	O. yallundae	17
Pseudomonas	BR8PS4	1	O. yallundae	14
Pseudomonas	BR8PS4	2	O. yallundae	19
Pseudomonas	BR8PS4	2	O. yallundae	14
Pseudomonas	BR8PS4	2	O. yallundae	17
Pseudomonas	BR8PS5	1	O. yallundae	12		11.8333
Pseudomonas	BR8PS5	1	O. yallundae	14
Pseudomonas	BR8PS5	1	O. yallundae	10
Pseudomonas	BR8PS5	2	O. yallundae	7
Pseudomonas	BR8PS5	2	O. yallundae	15
Pseudomonas	BR8PS5	2	O. yallundae	13
Pseudomonas	BS3PS2	1	O. yallundae	15		16
Pseudomonas	BS3PS2	1	O. yallundae	15
Pseudomonas	BS3PS2	1	O. yallundae	12
Pseudomonas	BS3PS2	2	O. yallundae	/
Pseudomonas	BS3PS2	2	O. yallundae	19
Pseudomonas	BS3PS2	2	O. yallundae	19
Pseudomonas	BS3PS3	1	O. yallundae	14		14.3333
Pseudomonas	BS3PS3	1	O. yallundae	15
Pseudomonas	BS3PS3	1	O. yallundae	15
Pseudomonas	BS3PS3	2	O. yallundae	13
Pseudomonas	BS3PS3	2	O. yallundae	13
Pseudomonas	BS3PS3	2	O. yallundae	16
Pseudomonas	CE10PS1	1	O. yallundae	10		14
Pseudomonas	CE10PS1	1	O. yallundae	15
Pseudomonas	CE10PS1	1	O. yallundae	14
Pseudomonas	CE10PS1	2	O. yallundae	10
Pseudomonas	CE10PS1	2	O. yallundae	20
Pseudomonas	CE10PS1	2	O. yallundae	15
Pseudomonas	CF10PS3	1	O. yallundae	13		7.33333
Pseudomonas	CF10PS3	1	O. yallundae	16
Pseudomonas	CF10PS3	1	O. yallundae	0
Pseudomonas	CF10PS3	2	O. yallundae	0
Pseudomonas	CF10PS3	2	O. yallundae	0
Pseudomonas	CF10PS3	2	O. yallundae	15
Pseudomonas	CF10PS4	1	O. yallundae	13		6.5
Pseudomonas	CF10PS4	1	O. yallundae	14
Pseudomonas	CF10PS4	1	O. yallundae	0
Pseudomonas	CF10PS4	2	O. yallundae	0
Pseudomonas	CF10PS4	2	O. yallundae	0
Pseudomonas	CF10PS4	2	O. yallundae	12
Pseudomonas	CF11PS1	1	O. yallundae	10		6.5
Pseudomonas	CF11PS1	1	O. yallundae	13
Pseudomonas	CF11PS1	1	O. yallundae	0
Pseudomonas	CF11PS1	2	O. yallundae	0
Pseudomonas	CF11PS1	2	O. yallundae	0
Pseudomonas	CF11PS1	2	O. yallundae	16
Pseudomonas	CR3PS2	1	O. yallundae	18		18
Pseudomonas	CR3PS2	1	O. yallundae	17
Pseudomonas	CR3PS2	1	O. yallundae	18
Pseudomonas	CR3PS2	2	O. yallundae	16
Pseudomonas	CR3PS2	2	O. yallundae	19
Pseudomonas	CR3PS2	2	O. yallundae	20
Pseudomonas	CR6PS3	1	O. yallundae	10		15
Pseudomonas	CR6PS3	1	O. yallundae	14
Pseudomonas	CR6PS3	1	O. yallundae	15
Pseudomonas	CR6PS3	2	O. yallundae	22
Pseudomonas	CR6PS3	2	O. yallundae	14
Pseudomonas	CR6PS3	2	O. yallundae	15
Pseudomonas	CR6PS4	1	O. yallundae	12		14
Pseudomonas	CR6PS4	1	O. yallundae	17
Pseudomonas	CR6PS4	1	O. yallundae	10
Pseudomonas	CR6PS4	2	O. yallundae	17
Pseudomonas	CR6PS4	2	O. yallundae	/
Pseudomonas	CR6PS4	2	O. yallundae	14
Pseudomonas	CR6PS5	1	O. yallundae	8		13
Pseudomonas	CR6PS5	1	O. yallundae	11
Pseudomonas	CR6PS5	1	O. yallundae	13
Pseudomonas	CR6PS5	2	O. yallundae	16
Pseudomonas	CR6PS5	2	O. yallundae	15
Pseudomonas	CR6PS5	2	O. yallundae	15
Pseudomonas	CR7PS1	1	O. yallundae	18		17.3333
Pseudomonas	CR7PS1	1	O. yallundae	18
Pseudomonas	CR7PS1	1	O. yallundae	17
Pseudomonas	CR7PS1	2	O. yallundae	18
Pseudomonas	CR7PS1	2	O. yallundae	16
Pseudomonas	CR7PS1	2	O. yallundae	17
Pseudomonas	DR10PS5	1	O. yallundae	14		14.6667
Pseudomonas	DR10PS5	1	O. yallundae	13
Pseudomonas	DR10PS5	1	O. yallundae	12
Pseudomonas	DR10PS5	2	O. yallundae	19
Pseudomonas	DR10PS5	2	O. yallundae	13
Pseudomonas	DR10PS5	2	O. yallundae	17
Pseudomonas	DR1PS3	1	O. yallundae	17		7.2
Pseudomonas	DR1PS3	1	O. yallundae	/
Pseudomonas	DR1PS3	1	O. yallundae	19
Pseudomonas	DR1PS3	2	O. yallundae	0
Pseudomonas	DR1PS3	2	O. yallundae	0
Pseudomonas	DR1PS3	2	O. yallundae	0
Pseudomonas	DR4PS3	1	O. yallundae	18		16.6
Pseudomonas	DR4PS3	1	O. yallundae	18
Pseudomonas	DR4PS3	1	O. yallundae	17
Pseudomonas	DR4PS3	2	O. yallundae	/
Pseudomonas	DR4PS3	2	O. yallundae	16
Pseudomonas	DR4PS3	2	O. yallundae	14
Pseudomonas	DS3PS4	1	O. yallundae	22		19.3333
Pseudomonas	DS3PS4	1	O. yallundae	17
Pseudomonas	DS3PS4	1	O. yallundae	20
Pseudomonas	DS3PS4	2	O. yallundae	18
Pseudomonas	DS3PS4	2	O. yallundae	20
Pseudomonas	DS3PS4	2	O. yallundae	19
Pseudomonas	DS3PS5	1	O. yallundae	20		18
Pseudomonas	DS3PS5	1	O. yallundae	18
Pseudomonas	DS3PS5	1	O. yallundae	20
Pseudomonas	DS3PS5	2	O. yallundae	15
Pseudomonas	DS3PS5	2	O. yallundae	18
Pseudomonas	DS3PS5	2	O. yallundae	17

## Sheet: Zt
Genus	strain	repetition	pathogen	inhibition measure	remarks	mean
Pseudomonas	AE10PS1	1	Z.tritici	/	Contamination and no Zt	0
Pseudomonas	AE10PS1	1	Z.tritici	/	Contamination and no Zt
Pseudomonas	AE10PS1	1	Z.tritici	/	Contamination and no Zt
Pseudomonas	AE10PS1	2	Z.tritici	0
Pseudomonas	AE10PS1	2	Z.tritici	0
Pseudomonas	AE10PS1	2	Z.tritici	0
Pseudomonas	AE10PS1	3	Z.tritici	0
Pseudomonas	AE10PS1	3	Z.tritici	0
Pseudomonas	AE10PS1	3	Z.tritici	0
Pseudomonas	AE11PS2	1	Z.tritici	/	Contamination and no Zt	5.2
Pseudomonas	AE11PS2	1	Z.tritici	/	Contamination and no Zt
Pseudomonas	AE11PS2	1	Z.tritici	/	Contamination and no Zt
Pseudomonas	AE11PS2	2	Z.tritici	4
Pseudomonas	AE11PS2	2	Z.tritici	6
Pseudomonas	AE11PS2	2	Z.tritici	4
Pseudomonas	AE11PS2	3	Z.tritici	5
Pseudomonas	AE11PS2	3	Z.tritici	/	weird
Pseudomonas	AE11PS2	3	Z.tritici	7
Pseudomonas	AE11PS3	1	Z.tritici	/	Contamination and no Zt	5.83333
Pseudomonas	AE11PS3	1	Z.tritici	/	Contamination and no Zt
Pseudomonas	AE11PS3	1	Z.tritici	/	Contamination and no Zt
Pseudomonas	AE11PS3	2	Z.tritici	5
Pseudomonas	AE11PS3	2	Z.tritici	7
Pseudomonas	AE11PS3	2	Z.tritici	5
Pseudomonas	AE11PS3	3	Z.tritici	6
Pseudomonas	AE11PS3	3	Z.tritici	7
Pseudomonas	AE11PS3	3	Z.tritici	5
Pseudomonas	AE11PS4	1	Z.tritici	/	Contamination and no Zt	6.33333
Pseudomonas	AE11PS4	1	Z.tritici	/	Contamination and no Zt
Pseudomonas	AE11PS4	1	Z.tritici	/	Contamination and no Zt
Pseudomonas	AE11PS4	2	Z.tritici	8
Pseudomonas	AE11PS4	2	Z.tritici	6
Pseudomonas	AE11PS4	2	Z.tritici	5
Pseudomonas	AE11PS4	3	Z.tritici	7
Pseudomonas	AE11PS4	3	Z.tritici	7
Pseudomonas	AE11PS4	3	Z.tritici	5
Pseudomonas	AE12PS1	1	Z.tritici	/	Contamination and no Zt	4
Pseudomonas	AE12PS1	1	Z.tritici	/	Contamination and no Zt
Pseudomonas	AE12PS1	1	Z.tritici	/	Contamination and no Zt
Pseudomonas	AE12PS1	2	Z.tritici	5
Pseudomonas	AE12PS1	2	Z.tritici	5
Pseudomonas	AE12PS1	2	Z.tritici	5
Pseudomonas	AE12PS1	3	Z.tritici	3
Pseudomonas	AE12PS1	3	Z.tritici	3
Pseudomonas	AE12PS1	3	Z.tritici	3
Pseudomonas	AE12PS4	1	Z.tritici	/	Contamination and no Zt	4.5
Pseudomonas	AE12PS4	1	Z.tritici	/	Contamination and no Zt
Pseudomonas	AE12PS4	1	Z.tritici	/	Contamination and no Zt
Pseudomonas	AE12PS4	2	Z.tritici	5
Pseudomonas	AE12PS4	2	Z.tritici	5
Pseudomonas	AE12PS4	2	Z.tritici	5
Pseudomonas	AE12PS4	3	Z.tritici	4
Pseudomonas	AE12PS4	3	Z.tritici	4
Pseudomonas	AE12PS4	3	Z.tritici	4
Pseudomonas	AE12PS5	1	Z.tritici	/	Contamination and no Zt	3.66667
Pseudomonas	AE12PS5	1	Z.tritici	/	Contamination and no Zt
Pseudomonas	AE12PS5	1	Z.tritici	/	Contamination and no Zt
Pseudomonas	AE12PS5	2	Z.tritici	3
Pseudomonas	AE12PS5	2	Z.tritici	3
Pseudomonas	AE12PS5	2	Z.tritici	4	4.66667
Pseudomonas	AE12PS5	3	Z.tritici	4
Pseudomonas	AE12PS5	3	Z.tritici	4
Pseudomonas	AE12PS5	3	Z.tritici	4
Pseudomonas	AR11PS3	1	Z.tritici	/	Contamination and no Zt	#DIV/0!
Pseudomonas	AR11PS3	1	Z.tritici	/	Contamination and no Zt
Pseudomonas	AR11PS3	1	Z.tritici	/	Contamination and no Zt
Pseudomonas	AR11PS3	2	Z.tritici	/	No Zt
Pseudomonas	AR11PS3	2	Z.tritici	/	No Zt
Pseudomonas	AR11PS3	2	Z.tritici	/	No Zt
Pseudomonas	AR11PS3	3	Z.tritici	/	No Zt
Pseudomonas	AR11PS3	3	Z.tritici	/	No Zt
Pseudomonas	AR11PS3	3	Z.tritici	/	No Zt
Pseudomonas	AR12PS3	1	Z.tritici	/	Contamination and no Zt	0
Pseudomonas	AR12PS3	1	Z.tritici	/	Contamination and no Zt
Pseudomonas	AR12PS3	1	Z.tritici	/	Contamination and no Zt
Pseudomonas	AR12PS3	2	Z.tritici	0
Pseudomonas	AR12PS3	2	Z.tritici	0
Pseudomonas	AR12PS3	2	Z.tritici	0
Pseudomonas	AR12PS3	3	Z.tritici	0
Pseudomonas	AR12PS3	3	Z.tritici	0
Pseudomonas	AR12PS3	3	Z.tritici	0
Pseudomonas	BE10PS1	1	Z.tritici	/	Contamination and no Zt	0
Pseudomonas	BE10PS1	1	Z.tritici	/	Contamination and no Zt
Pseudomonas	BE10PS1	1	Z.tritici	/	Contamination and no Zt
Pseudomonas	BE10PS1	2	Z.tritici	0
Pseudomonas	BE10PS1	2	Z.tritici	0
Pseudomonas	BE10PS1	2	Z.tritici	0
Pseudomonas	BE10PS1	3	Z.tritici	0
Pseudomonas	BE10PS1	3	Z.tritici	0
Pseudomonas	BE10PS1	3	Z.tritici	0
Pseudomonas	BE10PS1	1	Z.tritici	/	Contamination and no Zt	0
Pseudomonas	BE10PS1	1	Z.tritici	/	Contamination and no Zt
Pseudomonas	BE10PS1	1	Z.tritici	/	Contamination and no Zt
Pseudomonas	BE10PS1	2	Z.tritici	0
Pseudomonas	BE10PS1	2	Z.tritici	0
Pseudomonas	BE10PS1	2	Z.tritici	0
Pseudomonas	BE10PS1	3	Z.tritici	0
Pseudomonas	BE10PS1	3	Z.tritici	0
Pseudomonas	BE10PS1	3	Z.tritici	0
Pseudomonas	BE11PS1	1	Z.tritici	/	Contamination and no Zt	0
Pseudomonas	BE11PS1	1	Z.tritici	/	Contamination and no Zt
Pseudomonas	BE11PS1	1	Z.tritici	/	Contamination and no Zt
Pseudomonas	BE11PS1	2	Z.tritici	0
Pseudomonas	BE11PS1	2	Z.tritici	0
Pseudomonas	BE11PS1	2	Z.tritici	0
Pseudomonas	BE11PS1	3	Z.tritici	0
Pseudomonas	BE11PS1	3	Z.tritici	0
Pseudomonas	BE11PS1	3	Z.tritici	0
Pseudomonas	BF10PS1	1	Z.tritici	/	Contamination and no Zt	4.83333
Pseudomonas	BF10PS1	1	Z.tritici	/	Contamination and no Zt
Pseudomonas	BF10PS1	1	Z.tritici	/	Contamination and no Zt
Pseudomonas	BF10PS1	2	Z.tritici	7	Contamination
Pseudomonas	BF10PS1	2	Z.tritici	5
Pseudomonas	BF10PS1	2	Z.tritici	5
Pseudomonas	BF10PS1	3	Z.tritici	4
Pseudomonas	BF10PS1	3	Z.tritici	4
Pseudomonas	BF10PS1	3	Z.tritici	4
Pseudomonas	BF6PS1	1	Z.tritici	/	Contamination and no Zt	5.33333
Pseudomonas	BF6PS1	1	Z.tritici	/	Contamination and no Zt
Pseudomonas	BF6PS1	1	Z.tritici	/	Contamination and no Zt
Pseudomonas	BF6PS1	2	Z.tritici	6
Pseudomonas	BF6PS1	2	Z.tritici	6
Pseudomonas	BF6PS1	2	Z.tritici	4
Pseudomonas	BF6PS1	3	Z.tritici	/	No Zt
Pseudomonas	BF6PS1	3	Z.tritici	/	No Zt
Pseudomonas	BF6PS1	3	Z.tritici	/	No Zt
Pseudomonas	BF6PS1	3	Z.tritici	/	No Zt	4.66667
Pseudomonas	BF6PS1	3	Z.tritici	/	No Zt
Pseudomonas	BF6PS1	3	Z.tritici	/	No Zt
Pseudomonas	BF8PS1	1	Z.tritici	/	Contamination and no Zt
Pseudomonas	BF8PS1	1	Z.tritici	/	Contamination and no Zt
Pseudomonas	BF8PS1	1	Z.tritici	/	Contamination and no Zt
Pseudomonas	BF8PS1	2	Z.tritici	5
Pseudomonas	BF8PS1	2	Z.tritici	4
Pseudomonas	BF8PS1	2	Z.tritici	5
Pseudomonas	BF8PS1	3	Z.tritici	4		4.5
Pseudomonas	BF8PS1	3	Z.tritici	4
Pseudomonas	BF8PS1	3	Z.tritici	4
Pseudomonas	BR8PS4	1	Z.tritici	/	Contamination and no Zt
Pseudomonas	BR8PS4	1	Z.tritici	/	Contamination and no Zt
Pseudomonas	BR8PS4	1	Z.tritici	/	Contamination and no Zt
Pseudomonas	BR8PS4	2	Z.tritici	5
Pseudomonas	BR8PS4	2	Z.tritici	5
Pseudomonas	BR8PS4	2	Z.tritici	5
Pseudomonas	BR8PS4	3	Z.tritici	4		4
Pseudomonas	BR8PS4	3	Z.tritici	3
Pseudomonas	BR8PS4	3	Z.tritici	6
Pseudomonas	BR8PS5	1	Z.tritici	/	Contamination and no Zt
Pseudomonas	BR8PS5	1	Z.tritici	/	Contamination and no Zt
Pseudomonas	BR8PS5	1	Z.tritici	/	Contamination and no Zt
Pseudomonas	BR8PS5	2	Z.tritici	5
Pseudomonas	BR8PS5	2	Z.tritici	3
Pseudomonas	BR8PS5	2	Z.tritici	3
Pseudomonas	BR8PS5	3	Z.tritici	4		3.66667
Pseudomonas	BR8PS5	3	Z.tritici	4
Pseudomonas	BR8PS5	3	Z.tritici	4
Pseudomonas	BS3PS2	1	Z.tritici	3
Pseudomonas	BS3PS2	1	Z.tritici	5
Pseudomonas	BS3PS2	1	Z.tritici	5
Pseudomonas	BS3PS2	2	Z.tritici	2
Pseudomonas	BS3PS2	2	Z.tritici	3	several drops
Pseudomonas	BS3PS2	2	Z.tritici	3
Pseudomonas	BS3PS3	1	Z.tritici	5	several drops	4
Pseudomonas	BS3PS3	1	Z.tritici	3
Pseudomonas	BS3PS3	1	Z.tritici	7
Pseudomonas	BS3PS3	2	Z.tritici	3
Pseudomonas	BS3PS3	2	Z.tritici	3
Pseudomonas	BS3PS3	2	Z.tritici	3
Pseudomonas	CE10PS1	1	Z.tritici	/	Contamination and no Zt
Pseudomonas	CE10PS1	1	Z.tritici	/	Contamination and no Zt
Pseudomonas	CE10PS1	1	Z.tritici	/	Contamination and no Zt
Pseudomonas	CE10PS1	2	Z.tritici	0		0
Pseudomonas	CE10PS1	2	Z.tritici	0
Pseudomonas	CE10PS1	2	Z.tritici	0
Pseudomonas	CE10PS1	3	Z.tritici	0
Pseudomonas	CE10PS1	3	Z.tritici	0
Pseudomonas	CE10PS1	3	Z.tritici	0
Pseudomonas	CF10PS3	1	Z.tritici	/	Contamination and no Zt
Pseudomonas	CF10PS3	1	Z.tritici	/	Contamination and no Zt
Pseudomonas	CF10PS3	1	Z.tritici	/	Contamination and no Zt
Pseudomonas	CF10PS3	2	Z.tritici	2		2.66667
Pseudomonas	CF10PS3	2	Z.tritici	2
Pseudomonas	CF10PS3	2	Z.tritici	4
Pseudomonas	CF10PS3	3	Z.tritici	3
Pseudomonas	CF10PS3	3	Z.tritici	2
Pseudomonas	CF10PS3	3	Z.tritici	3
Pseudomonas	CF10PS4	1	Z.tritici	/	Contamination and no Zt
Pseudomonas	CF10PS4	1	Z.tritici	/	Contamination and no Zt
Pseudomonas	CF10PS4	1	Z.tritici	/	Contamination and no Zt
Pseudomonas	CF10PS4	2	Z.tritici	5		3.5
Pseudomonas	CF10PS4	2	Z.tritici	3
Pseudomonas	CF10PS4	2	Z.tritici	3
Pseudomonas	CF10PS4	3	Z.tritici	3
Pseudomonas	CF10PS4	3	Z.tritici	3
Pseudomonas	CF10PS4	3	Z.tritici	4
Pseudomonas	CF11PS1	1	Z.tritici	/	Contamination and no Zt
Pseudomonas	CF11PS1	1	Z.tritici	/	Contamination and no Zt
Pseudomonas	CF11PS1	1	Z.tritici	/	Contamination and no Zt
Pseudomonas	CF11PS1	2	Z.tritici	0		0
Pseudomonas	CF11PS1	2	Z.tritici	0
Pseudomonas	CF11PS1	2	Z.tritici	0
Pseudomonas	CF11PS1	3	Z.tritici	0
Pseudomonas	CF11PS1	3	Z.tritici	0
Pseudomonas	CF11PS1	3	Z.tritici	0
Pseudomonas	CR3PS2	1	Z.tritici	/	Contamination and no Zt
Pseudomonas	CR3PS2	1	Z.tritici	/	Contamination and no Zt
Pseudomonas	CR3PS2	1	Z.tritici	/	Contamination and no Zt
Pseudomonas	CR3PS2	2	Z.tritici	/	No Zt	#DIV/0!
Pseudomonas	CR3PS2	2	Z.tritici	/	No Zt
Pseudomonas	CR3PS2	2	Z.tritici	/	No Zt
Pseudomonas	CR3PS2	3	Z.tritici	/	No Zt
Pseudomonas	CR3PS2	3	Z.tritici	/	No Zt
Pseudomonas	CR3PS2	3	Z.tritici	/	No Zt
Pseudomonas	CR3PS2	3	Z.tritici	/	No Zt
Pseudomonas	CR3PS2	3	Z.tritici	/	No Zt
Pseudomonas	CR3PS2	3	Z.tritici	/	No Zt
Pseudomonas	CR6PS3	1	Z.tritici	10	several drops	7.25
Pseudomonas	CR6PS3	1	Z.tritici	10
Pseudomonas	CR6PS3	1	Z.tritici	7	several drops
Pseudomonas	CR6PS3	2	Z.tritici	7
Pseudomonas	CR6PS3	2	Z.tritici	5
Pseudomonas	CR6PS3	2	Z.tritici	4
Pseudomonas	CR6PS4	1	Z.tritici	8	several drops	5.8
Pseudomonas	CR6PS4	1	Z.tritici	7
Pseudomonas	CR6PS4	1	Z.tritici	/	Contamination and no Zt
Pseudomonas	CR6PS4	2	Z.tritici	5
Pseudomonas	CR6PS4	2	Z.tritici	5
Pseudomonas	CR6PS4	2	Z.tritici	4
Pseudomonas	CR6PS5	1	Z.tritici	/	Contamination and no Zt	5.16667
Pseudomonas	CR6PS5	1	Z.tritici	/	Contamination and no Zt
Pseudomonas	CR6PS5	1	Z.tritici	/	Contamination and no Zt
Pseudomonas	CR6PS5	2	Z.tritici	3
Pseudomonas	CR6PS5	2	Z.tritici	4
Pseudomonas	CR6PS5	2	Z.tritici	3
Pseudomonas	CR6PS5	3	Z.tritici	7
Pseudomonas	CR6PS5	3	Z.tritici	7
Pseudomonas	CR6PS5	3	Z.tritici	7
Pseudomonas	CR7PS1	1	Z.tritici	/	Contamination and no Zt	0
Pseudomonas	CR7PS1	1	Z.tritici	/	Contamination and no Zt
Pseudomonas	CR7PS1	1	Z.tritici	/	Contamination and no Zt
Pseudomonas	CR7PS1	2	Z.tritici	0
Pseudomonas	CR7PS1	2	Z.tritici	0
Pseudomonas	CR7PS1	2	Z.tritici	0
Pseudomonas	CR7PS1	3	Z.tritici	0
Pseudomonas	CR7PS1	3	Z.tritici	0
Pseudomonas	CR7PS1	3	Z.tritici	0
Pseudomonas	DR10PS5	1	Z.tritici	/	Contamination and no Zt	0
Pseudomonas	DR10PS5	1	Z.tritici	/	Contamination and no Zt
Pseudomonas	DR10PS5	1	Z.tritici	/	Contamination and no Zt
Pseudomonas	DR10PS5	2	Z.tritici	0
Pseudomonas	DR10PS5	2	Z.tritici	0
Pseudomonas	DR10PS5	2	Z.tritici	0
Pseudomonas	DR10PS5	3	Z.tritici	0
Pseudomonas	DR10PS5	3	Z.tritici	0
Pseudomonas	DR10PS5	3	Z.tritici	0
Pseudomonas	DR1PS3	1	Z.tritici	0		0
Pseudomonas	DR1PS3	1	Z.tritici	0
Pseudomonas	DR1PS3	1	Z.tritici	0	Contamination
Pseudomonas	DR1PS3	2	Z.tritici	0
Pseudomonas	DR1PS3	2	Z.tritici	0
Pseudomonas	DR1PS3	2	Z.tritici	0
Pseudomonas	DR4PS3	1	Z.tritici	/	Contamination and no Zt	5.83333
Pseudomonas	DR4PS3	1	Z.tritici	/	Contamination and no Zt
Pseudomonas	DR4PS3	1	Z.tritici	/
Pseudomonas	DR4PS3	2	Z.tritici	5
Pseudomonas	DR4PS3	2	Z.tritici	5
Pseudomonas	DR4PS3	2	Z.tritici	4
Pseudomonas	DR4PS3	3	Z.tritici	7
Pseudomonas	DR4PS3	3	Z.tritici	7
Pseudomonas	DR4PS3	3	Z.tritici	7
Pseudomonas	DS3PS4	1	Z.tritici	0		0
Pseudomonas	DS3PS4	1	Z.tritici	0
Pseudomonas	DS3PS4	1	Z.tritici	0	Contamination
Pseudomonas	DS3PS4	2	Z.tritici	0
Pseudomonas	DS3PS4	2	Z.tritici	0
Pseudomonas	DS3PS4	2	Z.tritici	0
Pseudomonas	DS3PS5	1	Z.tritici	0		0
Pseudomonas	DS3PS5	1	Z.tritici	0
Pseudomonas	DS3PS5	1	Z.tritici	0
Pseudomonas	DS3PS5	2	Z.tritici	0
Pseudomonas	DS3PS5	2	Z.tritici	0
Pseudomonas	DS3PS5	2	Z.tritici	0
