# Supplementary material for: Biocontrol-relevant diversity of wheat-associated Pseudomonas: prevalence of P. sivasensis and identification of the novel species P. arvensis sp. nov
Source: PeerJ. 2025 Nov 5;13:e20177. doi: 10.7717/peerj.20177 (PMC12595949; doi:10.7717/peerj.20177)
Supplement: Supplemental Information 2 [file peerj-13-20177-s002.xlsx]

## Sheet: Symptoms
	Symptoms
	2024-02-16	2024-02-15	2024-02-13
CF10PS3	20	5	2
CF10PS3	25	2	2
CF10PS3	10	2	0
CF10PS3	25	2	2
CF10PS3	25	10	2
CF10PS3	10	5	2
CF10PS3	20	2	0
CF10PS3	25	5	2
Positive	90	50	50
Positive	50	35	25
Positive	35	50	70
Positive	35	80	35
Positive	100	50	35
Positive	50	50	35
Positive	70	50	50
Positive	50	50	50
Negative	0
Negative	0
Negative	0
Negative	0
Negative	0
Negative	0
Negative	0
Negative	0
				Positive control	Mock treated
				52.6667	0										0dbi	0.0178895
															2dbi	0.00486514
															3dbi	0.00573028
															Neg	0.00549365
				Positive control	Mock treated
				22.4298	0

## Sheet: Pycnidia
	Pycnidia
	2024-02-16
CF10PS3	0
CF10PS3	37
CF10PS3	71
CF10PS3	31
CF10PS3	23
CF10PS3	0
CF10PS3	31
CF10PS3	55
Positive	80
Positive	86
Positive	83
Positive	106
Positive	121
Positive	0
Positive	91
Positive	131
Negative	0
Negative	0
Negative	0
Negative	0
Negative	0
Negative	0
Negative	0
Negative	0
